# Supplementary material for: High-dimensional analysis of 16 SARS-CoV-2 vaccine combinations reveals lymphocyte signatures correlating with immunogenicity
Source: PubMed Central journal article supplement (PMC10232362; doi:10.1038/s41590-023-01499-w), 2023-04-24
Supplement: 41590_2023_1499_MOESM4_ESM.pdf [file 41590_2023_1499_MOESM4_ESM.pdf]

## Flow cytometry antibodies – B cell panel

| <b>Surface</b>      |                |              |                 |                  |
|---------------------|----------------|--------------|-----------------|------------------|
| <b>Fluorochrome</b> | <b>Antigen</b> | <b>Clone</b> | <b>Dilution</b> | <b>Company</b>   |
| BV785               | CCR7           | G043H7       | 1/100           | Biolegend        |
| BV650               | CXCR3          | G025H7       | 1/25            | Biolegend        |
| BUV615-p            | CCR4           | 1G1          | 1/100           | BD               |
| BV711               | CCR6           | G034E3       | 1/40            | Biolegend        |
| BV750               | CXCR5          | RF8B2        | 1/40            | BD               |
| PE                  | CXCR4          | QA18A64      | 1/150           | Biolegend        |
| BUV395              | CD45RA         | HI100        | 1/1500          | BD               |
| Pacific Blue        | CD62L          | DREG-56      | 1/200           |                  |
| BUV496              | CD16           | 3G8          | 1/100           | BD               |
| BUV805              | CD3            | UCHT1        | 1/50            | BD               |
| BV570               | CD20           | 2H7          | 1/40            | Biolegend        |
| Pe-Cy5.5            | CD19           | H1B19        | 1/250           | LifeTechnologies |
| BUV737              | CD56           | NCAM16.2     | 1/100           | BD               |
| PE/Dazzle™ 594      | IgM            | MHM-88       | 1/650           | Biolegend        |
| BUV563              | CD27           | M-T271       | 1/100           | BD               |
| Spark NIR           | CD14           | 63D3         | 1/200           | Biolegend        |
| Spark Blue 550      | CD4            | SK3          | 1/250           | Biolegend        |
| BV605               | PD1            | EH12.2H7     | 1/40            | Biolegend        |
| AF647               | IgG            | Polyclonal   | 1/5000          | Jackson          |
| PerCP               | CD45           | 2D1          | 1/75            | Biolegend        |
| BB700               | BAFFR          | 11C1         | 1/200           | BD               |
| BV510               | CD127          | A019D5       | 1/50            | Biolegend        |
| APC-Fire 810        | CD38           | HIT2         | 1/150           | Biolegend        |
| Pe-Cy7              | CD25           | M-A251       | 1/50            | Biolegend        |
| APC Fire 750        | CD21           | Bu32         | 1/50            | Biolegend        |
| R718                | CD8            | SK1          | 1/500           | BD               |
| FITC                | IgA            | Polyclonal   | 1/1000          | Jackson          |
| BV480               | IgD            | B56          | 1/150           | BD               |
