# Supplementary material for: High-dimensional analysis of 16 SARS-CoV-2 vaccine combinations reveals lymphocyte signatures correlating with immunogenicity
Source: PubMed Central journal article supplement (PMC10232362; doi:10.1038/s41590-023-01499-w), 2023-04-24
Supplement: 41590_2023_1499_MOESM5_ESM.pdf [file 41590_2023_1499_MOESM5_ESM.pdf]

## Flow cytometry antibodies - T cell panel

| <b>Surface</b>       |                    |              |                 |                  |
|----------------------|--------------------|--------------|-----------------|------------------|
| <b>Fluorochrome</b>  | <b>Antigen</b>     | <b>Clone</b> | <b>Dilution</b> | <b>Company</b>   |
| BV785                | CCR7               | G043H7       | 1/100           | Biolegend        |
| BV650                | CXCR3              | G025H7       | 1/25            | Biolegend        |
| BUV615-p             | CCR4               | 1G1          | 1/100           | BD               |
| BUV395               | TIGIT              | 747845       | 1/50            | BD               |
| BUV661               | HLA-DR             | G46-6        | 1/300           | BD               |
| BUV805               | CD3                | UCHT1        | 1/75            | BD               |
| BV570                | CD8                | RPA-T8       | 1/150           | Biolegend        |
| Pe-Cy5.5             | CD45RA             | MEM-56       | 1/125           | LifeTechnologies |
| BUV737               | CD16               | 3G8          | 1/300           | BD               |
| PE/Dazzle™ 594       | CD56               | 5.1H11       | 1/150           | Biolegend        |
| PE-Cy5               | TCR PANgd          | IMMU510      | 1/75            | Beckman Coulter  |
| BV421                | CD69               | FN50         | 1/100           | Biolegend        |
| Biotin               | CD103              | Ber-ACT8     | 1/140           | Biolegend        |
| BUV563               | CD27               | M-T271       | 1/100           | BD               |
| Spark NIR            | CD14               | 63D3         | 1/400           | Biolegend        |
| Spark Blue 550       | CD4                | SK3          | 1/100           | Biolegend        |
| BV605                | PD1                | EH12.2H7     | 1/35            | Biolegend        |
| BB660                | CD1c               | F10/21A3     | 1/200           | BD               |
| PerCP-eFluor 710     | CD39               | A1           | 1/75            | ThermoScientific |
| APC                  | CD95               | GB11         | 1/150           | BD               |
| Super Bright 436     | CD123              | 6H6          | 1/100           | ThermoScientific |
| PE-Fire810           | KLRG1              | SA231A2      | 1/150           | Biolegend        |
| PerCP                | CD45               | 2D1          | 1/100           | Biolegend        |
| PE                   | TCR V $\alpha$ 7.2 | 3C10         | 1/130           | Biolegend        |
| BB700                | TIM3               | 344823       | 1/75            | BD               |
| BV510                | CD127              | A019D5       | 1/50            | Biolegend        |
| BV750                | CD19               | SJ25C1       | 1/150           | BD               |
| APC-Fire 810         | CD38               | HIT2         | 1/100           | Biolegend        |
| <b>Intracellular</b> |                    |              |                 |                  |
| <b>Fluorochrome</b>  | <b>Antigen</b>     | <b>Clone</b> | <b>Isotype</b>  | <b>Company</b>   |
| Pe-Cy7               | FOXP3              | 236A/E7      | 1/25            | ThermoScientific |
| APC-eF780            | EOMES              | WD1928       | 1/30            | ThermoScientific |
| BB790-P              | CD152 (CTLA-4)     | BNI3         | 1/50            | BD               |
| BV711                | Tbet               | 4B10         | 1/50            | Biolegend        |
| AF700                | GZMB               | GB11         | 1/250           | BD               |
| AF488                | TCF1               | C63D9        | 1/400           | Cell Signaling   |
| BV480                | Ki-67              | B56          | 1/130           | BD               |
| BB630                | Streptavidin       |              | 1/500           | BD               |
